# Supplementary material
Source: publisher figshare collection journal article supplement (https://tandf.figshare.com/ndownloader/files/21983505)
Supplement: Supplementary file 1 [file 21983505]

**Supplementary material**

**Table S1.** Frequency of admission in the Wildlife Rehabilitation Centre, demographic data, conservation status order, family and specie of the wild birds included in the study during the period 2008-2017 (CR- Critically in danger; EN- endangered; DD- Insufficient information; NT- Near threatened; VU- Vulnerable; LC – Least Concern).

| ***Species descriptive*** | **Cases** | | | **Age** | | | | **Conservation status** | |
| --- | --- | --- | --- | --- | --- | --- | --- | --- | --- |
| **N (%)** | | | **Adult**  **(˃1year)** | | **Juvenile**  **(˂1year)** | |
| **GALLOANSERES** | |  | | |  | |  | |  |
| **ORDER ANSERIFORME** | |  |  | |  | |  | |  |
| **FAMILY ANATIDAE** | |  |  | |  | |  | |  |
| *Anas platyrhynchos* | | 68 (1.1) | | | 37 (0.6) | | 31 (0.5) | | LC |
| *Anas penelope* | | 1 (0.0) | | | 1 (0.0) | | 0 | | LC |
| *Cygnus olor* | | 2 (0.0) | | | 2 (0.0) | | 0 (0.0) | | LC |
| *Melanitta nigra* | | 19 (0.3) | | | 19 (0.3) | | 0 (0.0) | | EN |
| [**ORDER GALLIFORMES**](https://pt.wikipedia.org/wiki/Galliformes) | |  |  | |  | |  | |  |
| **FAMILY PHASIANIDAE** | |  |  | |  | |  | |  |
| *Alectoris rufa* | | 8 (0.1) | | | 8 (0.1) | | 0 (0.0) | | LC |
| *Coturnix coturnix* | | 4 (0.1) | | | 4 (0.1) | | 0 (0.0) | | LC |
| **NEOAVES** | |  | | |  | |  | |  |
| **ORDER CAPRIMULGIFORMES** | |  | | |  | |  | |  |
| **FAMILY CAPRIMULGIDAE** | |  | | |  | |  | |  |
| *Caprimulgus europaeus* | | 74 (1.2) | | | 60 (1.0) | | 14 (0.2) | | VU |
| **ORDER APODIFORMES** | |  | | |  | |  | |  |
| **FAMILY APODIDAE** | |  | | |  | |  | |  |
| *Apus apus* | | 361 (6.0) | | | 139 (2.3) | | 222 (3.7) | | LC |
| *Apus pallidus* | | 90 (1.5) | | | 40 (0.7) | | 50 (0.8) | | LC |
| **ORDER CUCULIFORMES** | |  | | |  | |  | |  |
| **FAMILY CUCULIDAE** | |  | | |  | |  | |  |
| *Cuculus canorus* | | 10 (0,2) | | | 10 (0.2) | | 0 (0.0) | | LC |
| **ORDER OTIDIFORMES** | |  | | |  | |  | |  |
| **FAMILY OTIDIDAE** | |  | | |  | |  | |  |
| *Tetrax tetrax* | | 2 (0.0) | | | 2 (0.0) | | 0 (0.0) | | VU |
| **ORDER COLUMBIFORMES** | |  | | |  | |  | |  |
| **FAMILY COLUMBIDAE** | |  | | |  | |  | |  |
| *Columba palumbus* | | 51 (0.8) | | | 41 (0.7) | | 10 (0.2) | | LC |
| *Streptopelia decaocto* | | 246 (4.1) | | | 211 (3.5) | | 35 (0.6) | | LC |
| *Streptopelia turtur* | | 5 (0.1) | | | 4 (0.1) | | 1 (0.0) | | LC |
| **ORDER GRUIFORMES** | |  | | |  | |  | |  |
| **FAMILY RALLIDAE** | |  | | |  | |  | |  |
| *Fulica atra* | | 3 (0.0) | | | 3 (0.0) | | 0 (0.0) | | LC |
| *Gallinula chloropus* | | 11 (0.2) | | | 7 (0.1) | | 4 (0.1) | | LC |
| *Rallus aquaticus* | | 1 (0.0) | | | 1 (0.0) | | 0 (0.0) | | LC |
| [**ORDER PODICIPEDIFORMES**](https://pt.wikipedia.org/wiki/Podicipediformes) | |  | | |  | |  | |  |
| [**FAMILY PODICIPEDIDAE**](https://en.wikipedia.org/wiki/Podicipedidae) | |  | | |  | |  | |  |
| *Tachybaptus ruficollis* | | 2 (0.0) | | | 2 (0.0) | | 0 (0.0) | | LC |
| **ORDER PHOENICOPTERIFORMES** | |  | | |  | |  | |  |
| **FAMILY PHOENICOPTERIDAE** | |  | | |  | |  | |  |
| *Phoenicopterus roseus* | | 2 (0.0) | | | 2 (0.0) | | 0 (0.0) | | VU |
| **ORDER CHARADRIIFORMES** | |  | | |  | |  | |  |
| [**FAMILY BURHINIDAE**](https://en.wikipedia.org/wiki/Burhinidae) | |  | | |  | |  | |  |
| *Burhinus oedicnemus* | | 1 (0.0) | | | 1 (0.0) | | 0 (0.0) | | VU |
| **FAMILY CHARADRIIDAE** | |  | | |  | |  | |  |
| *Charadrius alexandrinus* | | 19 (0.3) | | | 13 (0.2) | | 6 (0.1) | | LC |
| *Charadrius hiaticula* | | 1 (0.0) | | | 1 (0.0) | | 0 (0.0) | | LC |
| *Pluvialis apricaria* | | 1 (0.0) | | | 1 (0.0) | | 0 (0.0) | | LC |
| *Vanellus vanellus* | | 1 (0.0) | | | 1 (0.0) | | 0 (0.0) | | LC |
| **FAMILY LARIDAE** | |  | | |  | |  | |  |
| *Chroicocephalus ridibundus* | | 33 (0.5) | | | 31 (0.5) | | 2 (0.0) | | LC |
| *Ichthyaetus melanocephalus* | | 3 (0.0) | | | 3 (0.0) | | 0 (0.0) | | LC |
| *Larus argentatus* | | 18 (0.3) | | | 18 (0.3) | | 0 (0.0) | | LC |
| *Larus fuscus* | | 62 (1.0) | | | 62 (1.0) | | 0 (0.0) | | VU |
| *Larus marinus* | | 2 (0.0) | | | 2 (0.0) | | 0 (0.0) | | LC |
| *Larus melanocephalus* | | 3 (0.0) | | | 3 (0.0) | | 0 (0.0) | | LC |
| *Larus michahellis* | | 1844 (30.4) | | | 1698 (28.0) | | 146 (2.4) | | LC |
| *Sterna hirundo* | | 2 (0.0) | | | 2 (0.0) | | 0 (0.0) | | EN |
| *Sterna sandvicensis* | | 3 (0.0) | | | 3 (0.0) | | 0 (0.0) | | NT |
| **FAMILY ALCIDAE** | |  | | |  | |  | |  |
| *Alca torda* | | 7 (0.1) | | | 7 (0.1) | | 0 (0.0) | | LC |
| *Uria aalge* | | 10 (0.2) | | | 10 (0.2) | | 0 (0.0) | | CR |
| **FAMILY SCOLOPACIDAE** | |  | | |  | |  | |  |
| *Tringa nebularia* | | 1 (0.0) | | | 1 (0.0) | | 0 (0.0) | | VU |
| *Numenius phaeopus* | | 1 (0.0) | | | 0 (0.0) | | 0 (0.0) | | VU |
| *Actitis hypoleucos* | | 1 (0.0) | | | 1 (0.0) | | 0 (0.0) | | VU |
| *Arenaria interpres* | | 13 (0.2) | | | 13 (0.2) | | 0 (0.0) | | LC |
| *Calidris alba* | | 10 (0,2) | | | 10 (0.2) | | 0 (0.0) | | LC |
| *Calidris alpina* | | 3 (0.0) | | | 3 (0.0) | | 0 (0.0) | | LC |
| *Calidris canutus* | | 1 (0.0) | | | 1 (0.0) | | 0 (0.0) | | VU |
| *Gallinago gallinago* | | 6 (0.1) | | | 6 (0.1) | | 0 (0.0) | | CR |
| *Numenius arquata* | | 3 (0.0) | | | 3 (0.0) | | 0 (0.0) | | LC |
| *Scolopax rusticola* | | 13 (0.2) | | | 13 (0.2) | | 0 (0.0) | | DD |
| *Tringa totanus* | | 4 (0.1) | | | 3 (0.0) | | 1 (0.0) | | CR |
| **FAMILY STERCORARIIDAE** | |  | | |  | |  | |  |
| *Stercorarius parasiticus* | | 1 (0.0) | | | 1 (0.0) | | 0 (0.0) | | LC |
| [**ORDER GAVIIDAE**](https://pt.wikipedia.org/wiki/Gaviidae) | |  | | |  | |  | |  |
| [**FAMILY GAVIIDAE**](https://pt.wikipedia.org/wiki/Gaviidae) | |  | | |  | |  | |  |
| *Gavia stellata* | | 1 (0.0) | | | 1 (0.0) | | 0 (0.0) | | LC |
| **ORDER** [**PROCELLARIIFORMES**](https://en.wikipedia.org/wiki/Procellariiformes) | |  | | |  | |  | |  |
| **FAMILY PROCELLARIIDAE** | |  | | |  | |  | |  |
| *Calonectris diomedea* | | 2 (0.0) | | | 2 (0.0) | | 0 (0.0) | | VU |
| *Fulmarus glacialis* | | 2 (0.0) | | | 2 (0.0) | | 0 (0.0) | | LC |
| **FAMILY HYDROBATIDAE** | |  | | |  | |  | |  |
| *Oceanodroma castro* | | 1 (0.0) | | | 1 (0.0) | | 0 (0.0) | | VU |
| **ORDER CICONIIFORMES** | |  | | |  | |  | |  |
| **FAMILY CICONIIDAE** | |  | | |  | |  | |  |
| *Ciconia ciconia* | | 36 (0.6) | | | 35 (0.6) | | 1 (0.0) | | LC |
| **ORDER SULIFORMES** | |  | | |  | |  | |  |
| **FAMILY SULIDAE** | |  | | |  | |  | |  |
| *Morus bassanus* | | 103 (1.7) | | | 97 (1.6) | | 6 (0.1) | | LC |
| **FAMILY PHALACROCORACIDAE** | |  | | |  | |  | |  |
| *Phalacrocorax carbo* | | 14 (0.2) | | | 14 (0.2) | | 0 (0.0) | | LC |
| **ORDER PELECANIFORMES** | |  | | |  | |  | |  |
| **FAMILY ARDEIDAE** | |  | | |  | |  | |  |
| *Ardea cinerea* | | 28 | | | 0,5 | | 28 (0.5) | | 0(0.0) |
| *Ardea purpurea* | | 2 | | | 0 | | 2 (0.0) | | 0(0.0) |
| *Bubulcus ibis* | | 1 | | | 0 | | 1 (0.0) | | 0(0.0) |
| *Egretta garzetta* | | 5 | | | 0,1 | | 5 (0.1) | | 0(0.0) |
| *Ixobrychus minutos* | | 2 (0.0) | | | 2 (0.0) | | 0 (0.0) | | VU |
| **FAMILY THRESKIORNITHIDAE** | |  | | |  | |  | |  |
| *Plegadis falcinellus* | | 1 | | | 0 | | 1 (0.0) | | 0(0.0) |
| **TELLURAVES** | |  | | |  | |  | |  |
| **ORDER ACCIPITRIFORMES** | |  | | |  | |  | |  |
| **FAMILY ACCIPITRIDAE** | |  | | |  | |  | |  |
| *Accipiter gentilis* | | 82 (1,4) | | | 77 (1.3) | | 5 (0.1) | | VU |
| *Accipiter nisus* | | 163 (2.7) | | | 146 (2.4) | | 17 (0.3) | | LC |
| *Aegypius monachus* | | 1 (0.0) | | | 1 (0.0) | | 0 (0.0) | | CR |
| *Aquila pennata* | | 8 (0.1) | | | 8 (0.1) | | 0 (0.0) | | LC |
| *Buteo buteo* | | 201 (3.3) | | | 4 (0.1) | | 0 (0.0) | | NT |
| *Circaetus gallicus* | | 4 (0.1) | | | 4 (0.1) | | 0 (0.0) | | NT |
| *Circus aeruginosus* | | 3 (0.0) | | | 3 (0.0) | | 0 (0.0) | | VU |
| *Elanus caeruleus* | | 6 (0.1) | | | 6 (0.1) | | 0 (0.0) | | NT |
| *Milvus migrans* | | 17 (0,3) | | | 16 (0.3) | | 1 (0.0) | | NT |
| *Pernis apivorus* | | 9 (0,1) | | | 9 (0.1) | | 0 (0.0) | | VU |
| *Gyps fulvus* | | 1 (0.0) | | | 1 (0.0) | | 0 (0.0) | | NT |
| **FAMILY PANDIONIDAE** | |  | | |  | |  | |  |
| *Pandion haliaetus* | | 1 (0.0) | | | 1 (0.0) | | 0 (0.0) | | CR |
| **ORDER STRIGIFORMES** | |  | | |  | |  | |  |
| **FAMILY STRIGIDAE** | |  | | |  | |  | |  |
| *Asio flammeus* | | 8 (0,1) | | | 8 (0.1) | | 0 (0.0) | | EN |
| *Asio otus* | | 14 (0.2) | | | 12 (0.2) | | 2 (0.0) | | LC |
| *Athene noctua* | | 164 (2.7) | | | 126 (2.1) | | 38 (0.6) | | LC |
| *Bubo bubo* | | 4 (0,1) | | | 4 (0.1) | | 0 (0.0) | | NT |
| *Otus scops* | | 9 (0,1) | | | 6 (0.1) | | 3 (0.0) | | DD |
| *Strix aluco* | | 107 (1.8) | | | 83 (1.4) | | 24 (0.4) | | LC |
| **FAMILY TYTONIDAE** | |  | | |  | |  | |  |
| *Tyto alba* | | 133 (2.2) | | | 121 (2.0) | | 12 (0.2) | | LC |
| **ORDER BUCEROTIFORMES** | |  | | |  | |  | |  |
| **FAMILY UPUPIDAE** | |  | | |  | |  | |  |
| *Upupa epops* | | 17 (0.3) | | | 13 (0.2) | | 4 (0.1) | | LC |
| **ORDER CORACIIFORMES** | |  | | |  | |  | |  |
| **FAMILY ALCEDINIDAE** | |  | | |  | |  | |  |
| *Alcedo atthis* | | 17 (0.3) | | | 17 (0.3) | | 0 (0.0) | | LC |
| **FAMILY MEROPIDAE** | |  | | |  | |  | |  |
| *Merops apiaster* | | 1 (0.0) | | | 0 (0.0) | | 0 (0.0) | | VU |
| **ORDER PICIFORMES** | |  | | |  | |  | |  |
| **FAMILY PICIDAE** | |  | | |  | |  | |  |
| *Dendrocopos minor* | | 3 (0.0) | | | 3 (0.0) | | 0 (0.0) | | LC |
| *Jynx torquilla* | | 3 (0.0) | | | 0 (0.0) | | 3 (0.0) | | DD |
| *Picus viridis* | | 40 (0,7) | | | 34 (0.6) | | 6 (0.1) | | LC |
| **AUSTRALAVES** | |  | | |  | |  | |  |
| **ORDER FALCONIFORMES** | |  | | |  | |  | |  |
| **FAMILY FALCONIDAE** | |  | | |  | |  | |  |
| *Falco peregrinus* | | 12 (0.2) | | | 12 (0.2) | | 0 (0.0) | | VU |
| *Falco subbuteo* | | 4 (0.1) | | | 4 (0.1) | | 0 (0.0) | | VU |
| *Falco tinnunculos* | | 2 (0.0) | | | 56 (0.9) | | 7 (0.1) | | LC |
| **ORDER PASSERIFORMES** | |  | | |  | |  | |  |
| **FAMILY ACROCEPHALIDAE** | |  | | |  | |  | |  |
| *Hippolais icterina* | | 3 (0.0) | | | 3 (0.0) | | 0 (0.0) | | LC |
| *Hippolais polyglotta* | | 5 (0.1) | | | 5 (0.1) | | 0 (0.0) | | LC |
| **FAMILY AEGITHALIDAE** | |  | | |  | |  | |  |
| *Aegithalos caudatus* | | 1 (0.0) | | | 1 (0.0) | | 0 (0.0) | | LC |
| [**FAMILY CETTIIDAE**](https://en.wikipedia.org/wiki/Cettiidae) | |  | | |  | |  | |  |
| *Cettia cetti* | | 2 (0.0) | | | 2 (0.0) | | 0 (0.0) | | LC |
| [**FAMILY CISTICOLIDAE**](https://en.wikipedia.org/wiki/Cisticolidae) | |  | | |  | |  | |  |
| *Cisticola juncidis* | | 1 (0.0) | | | 1 (0.0) | | 0 (0.0) | | LC |
| **FAMILY CORVIDAE** | |  | | |  | |  | |  |
| *Corvus corax* | | 3 (0.0) | | | 3 (0.0) | | 0 (0.0) | | NT |
| *Corvus corone* | | 70 (1.2) | | | 70 (1.2) | | 0 (0.0) | | LC |
| *Garrulus glandarius* | | 71 (1.2) | | | 58 (1.0) | | 13 (0.2) | | LC |
| *Pica pica* | | 54 (0.9) | | | 37 (0.6) | | 17 (0.3) | | LC |
| **FAMILY EMBERIZIDAE** | |  | | |  | |  | |  |
| *Emberiza cia* | | 1 (0.0) | | | 1 (0.0) | | 0 (0.0) | | LC |
| **FAMILY FRINGILLIDAE** | |  | | |  | |  | |  |
| *Carduelis cannabina* | | 22 (0.4) | | | 22 (0.4) | | 0 (0.0) | | LC |
| *Carduelis carduelis* | | 270 (4.5) | | | 258 (4.3) | | 12 (0.2) | | LC |
| *Carduelis chloris* | | 78 (1.3) | | | 30 (0.5) | | 48 (0.8) | | LC |
| *Carduelis spinus* | | 12 (0.2) | | | 12 (0.2) | | 0 (0.0) | | LC |
| *Fringilla coelebs* | | 8 (0.1) | | | 8 (0.1) | | 0 (0.0) | | LC |
| *Fringilla montifringilla* | | 1 (0.0) | | | 1 (0.0) | | 0 (0.0) | | LC |
| *Pyrrhula pyrrhula* | | 38 (0.6) | | | 38 (0.60) | | 0 (0.0) | | LC |
| *Serinus serinus* | | 84 (1.4) | | | 3 (0.6) | | 45 (0.7) | | LC |
| **FAMILY HIRUNDINIDAE** | |  | | |  | |  | |  |
| *Delichon urbica* | | 21 (0.3) | | | 12 (0.2) | | 9 (0.1) | | LC |
| *Hirundo rustica* | | 46 (0.8) | | | 28 (0.5) | | 18 (0.3) | | LC |
| *Ptyonoprogne rupestris* | | 3 (0.0) | | | 2 (0.0) | | 1 (0.0) | | LC |
| [**FAMIY LOCUSTELLIDAE**](https://en.wikipedia.org/wiki/Locustellidae) | |  | | |  | |  | |  |
| *Locustella luscinioides* | | 2 (0.0) | | | 2 (0.0) | | 0 (0.0) | | VU |
| *Locustella naevia* | | 1 (0.0) | | | 1 (0.0) | | 0 (0.0) | | LC |
| **FAMILY MOTACILLIDAE** | |  | | |  | |  | |  |
| *Motacilla alba* | | 26 (0,4) | | | 14 (0.2) | | 12 (0.2) | | LC |
| *Motacilla cinerea* | | 1 (0.0) | | | 1 (0.0) | | 0 (0.0) | | LC |
| **FAMILY MUSCICAPIDAE** | |  | | |  | |  | |  |
| *Erithacus rubecula* | | 13 (0,2) | | | 11 (0.2) | | 2 (0.0) | | LC |
| *Ficedula hypoleuca* | | 12 (0,2) | | | 12 (0.2) | | 0 (0.0) | | LC |
| *Saxicola rubicola* | | 2 (0.0) | | | 2 (0.0) | | 0 (0.0) | | LC |
| *Phoenicurus ochruros* | | 7 (0.1) | | | 5 (0.1) | | 2 (0.0) | | LC |
| **FAMILY PARIDAE** | |  | | |  | |  | |  |
| *Cyanistes caeruleus* | | 3 (0.0) | | | 2 (0.0) | | 1 (0.0) | | LC |
| *Parus ater* | | 1 (0.0) | | | 1 (0.0) | | 0 (0.0) | | LC |
| *Parus caeruleus* | | 2 (0.0) | | | 1 (0.0) | | 1 (0.0) | | LC |
| *Parus major* | | 10 (0.2) | | | 4 (0.1) | | 6 (0.1) | | LC |
| **FAMILY PASSERIDAE** | |  | | |  | |  | |  |
| *Passer domesticus* | | 249 (4.1) | | | 133 (2.2) | | 116 (1.9) | | LC |
| *Petronia petronia* | | 1 (0.0) | | | 1 (0.0) | | 0 (0.0) | | LC |
| **FAMILY REGULIDAE** | |  | | |  | |  | |  |
| Regulus ignicapillus | | 2 (0.0) | | | 2 (0.0) | | 0 (0.0) | | LC |
| **FAMILY PHYLLOSCOPIDAE** | |  | | |  | |  | |  |
| *Phylloscopus collybita* | | 1 (0.0) | | | 1 (0.0) | | 0 (0.0) | | LC |
| *Phylloscopus trochilus* | | 9 (0.1) | | | 8 (0.1) | | 1 (0.0) | | LC |
| **FAMILY STURNIDAE** | |  | | |  | |  | |  |
| *Sturnus unicolor* | | 6 (0.1) | | | 6 (0.1) | | 0 (0.0) | | LC |
| *Sturnus vulgaris* | | 7 (0.1) | | | 5 (0.1) | | 2 (0.0) | | LC |
| [**FAMILY SYLVIIDAE**](https://en.wikipedia.org/wiki/Sylviidae) | |  | | |  | |  | |  |
| *Sylvia atricapilla* | | 10 (0.2) | | | 4 (0.1) | | 6 (0.1) | | LC |
| *Sylvia communis* | | 2 (0.0) | | | 2 (0.0) | | 0 (0.0) | | LC |
| *Sylvia melanocephala* | | 7 (0.1) | | | 5 (0.1) | | 2 (0.0) | | LC |
| [**FAMILY TROGLODYTIDAE**](https://pt.wikipedia.org/wiki/Troglodytidae) | |  | | |  | |  | |  |
| *Troglodytes troglodytes* | | 11 (0.2) | | | 4 (0.1) | | 7 (0.1) | | LC |
| **FAMILY TURDIDAE** | |  | | |  | |  | |  |
| *Turdus iliacus* | | 2 (0.0) | | | 2 (0.0) | | 0 (0.0) | | LC |
| *Turdus merula* | | 521 (8.6) | | | 290 (4.8) | | 231 (3.8) | | LC |
| *Turdus philomelos* | | 8 (0.1) | | | 6 (0.1) | | 2 (0.0) | | NT |
| *Turdus viscivorus* | | 12 (0.2) | | | 7 (0.1) | | 5 (0.1) | | LC |

**Table S2.** Main causes of admission of 6058 wild birds (total number and frequency) admitted into the Wildlife Rehabilitation Centre of Parque Biológico de Gaia according to the order, from 2008-2017.

|  | **Apprehended** | **Debilitated** | **Donated** | **Dead** | **Injured** | **Orphans** |
| --- | --- | --- | --- | --- | --- | --- |
| **ORDER** |  |  |  |  |  |  |
| Accipitriformes | 10 (0.2) | 32 (0.5) | 0 (0.0) | 1 (0.0) | 435 (7.2) | 18 (0.3) |
| Anserifomes | 0 (0.0) | 29 (0.5) | 0 (0.0) | 3 (0.0) | 28 (0.5) | 30 (0.5) |
| Apodiformes | 0 (0.0) | 74 (1.2) | 1 (0.0) | 0 (0.0) | 161 (2.7) | 215 (3.5) |
| Bucerotiformes | 0 (0.0) | 0 (0.0) | 0 (0.0) | 0 (0.0) | 14 (0.2) | 3 (0.0) |
| Caprimulgiformes | 0 (0.0) | 9 (0.1) | 0 (0.0) | 0 (0.0) | 52 (0.9) | 13 (0.2) |
| Charadriiformes | 0 (0.0) | 429 (7.1) | 2 (0.0) | 11 (0.2) | 1489 (24.4) | 135 (2.2) |
| Ciconiiformes | 0 (0.0) | 10 (0.2) | 0 (0.0) | 0 (0.0) | 25 (0.4) | 1 (0.0) |
| Columbiformes | 0 (0.0) | 66 (1.1) | 2 (0.0) | 1 (0.0) | 187 (3.1) | 46 (0.8) |
| Coraciiformes | 0 (0.0) | 5 (0.1) | 0 (0.0) | 0 (0.0) | 12 (0.2) | 0 (0.0) |
| Cuculiformes | 0 (0.0) | 3 (0.0) | 0 (0.0) | 0 (0.0) | 7 (0.1) | 0 (0.0) |
| Falconiformes | 1 (0.0) | 11 (0.2) | 0 (0.0) | 0 (0.0) | 61 (1.0) | 6 (0.1) |
| Galliformes | 3 (0.0) | 3 (0.0) | 0 (0.0) | 0 (0.0) | 6 (0.1) | 0 (0.0) |
| Gaviidae | 0 (0.0) | 0 (0.0) | 0 (0.0) | 0 (0.0) | 1 (0.0) | 0 (0.0) |
| Gruiformes | 0 (0.0) | 0 (0.0) | 0 (0.0) | 0 (0.0) | 11 (0.2) | 4 (0.1) |
| Otidiformes | 0 (0.0) | 0 (0.0) | 0 (0.0) | 1 (0.0) | 1 (0.0) | 0 (0.0) |
| Passeriformes | 436 (7.2) | 165 (2.7) | 17 (0.3) | 9 (0.1) | 555 (9.2) | 558 (9.2) |
| Pelecaniformes | 0 (0.0) | 4 (0.1) | 0 (0.0) | 0 (0.0) | 34 (0.5) | 0 (0.0) |
| Phoenicopteriformes | 0 (0.0) | 0 (0.0) | 0 (0.0) | 0 (0.0) | 2 (0.0) | 0 (0.0) |
| Piciformes | 0 (0.0) | 4 (0.1) | 0 (0.0) | 0 (0.0) | 30 (0.6) | 7 (0.1) |
| Procellariidae | 0 (0.0) | 0 (0.0) | 0 (0.0) | 0 (0.0) | 3 (0.0) | 0 (0.0) |
| Podicipediformes | 0 (0.0) | 1 (0.0) | 0 (0.0) | 0 (0.0) | 1 (0.0) | 0 (0.0) |
| Procellariiformes | 0 (0.0) | 3 (0.0) | 0 (0.0) | 0 (0.0) | 2 (0.0) | 0 (0.0) |
| Strigiformes | 4 (0.1) | 79 (1.3) | 1 (0.0) | 3 (0.0) | 281 (4.6) | 71 (1.2) |
| Suliformes | 0 (0.0) | 60 (1.0) | 0 (0.0) | 3 (0.0) | 55 (0.9) | 1 (0.0) |

**Table S3.** Distribution of the non-traumatic and traumatic causes mortality of the 6058 wild birds (total number and frequency) admitted into the Wildlife Rehabilitation Centre of Parque Biológico de Gaia distributed over the seasons order, from 2008-2017 (ND- Nutritional disorders; PD - Parasitic diseases; T- Toxic; ID - Infectious diseases; C- Captivity; UNT - Unknow non-traumatic; CB- Collision buildings; EL – Electrocution; P- Predation; G – Gunshot; FHN - Fishing hooks and nets; CV - Collision vehicles; UT - Unknow trauma).

|  | **NON-TRAUMA: Number of cases (%)** | | | | | | **TRAUMA: Number of cases (%)** | | | | | | | |
| --- | --- | --- | --- | --- | --- | --- | --- | --- | --- | --- | --- | --- | --- | --- |
| **ND** | **PD** | **T** | **ID** | **C** | **UNT** | **CB** | **EL** | **P** | **G** | **FHN** | **CV** | **UT** | |
| **ORDER** |  |  |  |  |  |  |  |  |  |  |  |  |  | |
| Accipitriformes | 0 (0.0) | 2 (0.0) | 16 (0.3) | 5 (0.1) | 12 (0.2) | 398 (6.6) | 0 (0.0) | 1 (0.0) | 1 (0.0) | 2 (0.0) | 22 (0.4) | 4 (0.1) | 33 (0.5) | |
| Anserifomes | 0 (0.0) | 1 (0.0) | 0 (0.0) | 0 (0.0) | 0 (0.0) | 30 (0.5) | 0 (0.0) | 0 (0.0) | 0 (0.0) | 0 (0.0) | 0 (0.0) | 0 (0.0) | 59 (1.0) | |
| Apodiformes | 0 (0.0) | 0 (0.0) | 3 (0.0) | 1 (0.0) | 0 (0.0) | 157 (2.6) | 0 (0.0) | 0 (0.0) | 137 (2.30) | 0 (0.0) | 1 (0.0) | 0 (0.0) | 152 (2.5) | |
| Bucerotiformes | 0 (0.0) | 2 (0.0) | 1 (0.0) | 0 (0.0) | 0 (0.0) | 11 (0.2) | 0 (0.0) | 0 (0.0) | 0 (0.0) | 0 (0.0) | 0 (0.0) | 0 (0.0) | 3 (0.0) | |
| Caprimulgiformes | 0 (0.0) | 0 (0.0) | 0 (0.0) | 2 (0.0) | 0 (0.0) | 49 (0.8) | 0 (0.0) | 0 (0.0) | 1 (0.0) | 0 (0.0) | 0 (0.0) | 1 (0.0) | 21 (0.3) | |
| Charadriiformes | 82 (1.40) | 41 (0.7) | 2 (0.0) | 4 (0.0) | 1 (0.0) | 1350 (22.28) | 353 (5.80) | 0 (0.0) | 24 (0.4) | 6 (0.1) | 9 (0.1) | 3 (0.0) | 191 (3.2) | |
| Ciconiiformes | 0 (0.0) | 0 (0.0) | 0 (0.0) | 0 (0.0) | 0 (0.0) | 25 (0.4) | 0 (0.0) | 0 (0.0) | 0 (0.0) | 0 (0.0) | 0 (0.0) | 0 (0.0) | 11 (0.2) | |
| Columbiformes | 0 (0.0) | 4 (0.1) | 2 (0.0) | 8 (0.1) | 0 (0.0) | 170 (2.8) | 0 (0.0) | 0 (0.0) | 27 (0.4) | 4 (0.1) | 26 (0.4) | 1 (0.0) | 60 (1.0) | |
| Coraciiformes | 0 (0.0) | 0 (0.0) | 0 (0.0) | 0 (0.0) | 0 (0.0) | 11 (0.2) | 0 (0.0) | 2 (0.0) | 0 (0.0) | 0 (0.0) | 0 (0.0) | 0 (0.0) | 4 (0.1) | |
| Cuculiformes | 0 (0.0) | 0 (0.0) | 0 (0.0) | 1 (0.0) | 0 (0.0) | 6 (0.1) | 0 (0.0) | 0 (0.0) | 0 (0.0) | 0 (0.0) | 0 (0.0) | 0 (0.0) | 3 (0.0) | |
| Falconiformes | 0 (0.0) | 1 (0.0) | 5 (0.1) | 0 (0.0) | 3 (0.0) | 51 (0.8) | 1 (0.0) | 0 (0.0) | 0 (0.0) | 1 (0.0) | 1 (0.0) | 1 (0.0) | 15 (0.2) | |
| Galliformes | 0 (0.0) | 0 (0.0) | 0 (0.0) | 0 (0.0) | 0 (0.0) | 6 (0.1) | 0 (0.0) | 0 (0.0) | 0 (0.0) | 0 (0.0) | 3 (0.0) | 0 (0.0) | 3 (0.0) | |
| Gaviidae | 0 (0.0) | 0 (0.0) | 0 (0.0) | 0 (0.0) | 0 (0.0) | 1 (0.0) | 0 (0.0) | 0 (0.0) | 0 (0.0) | 0 (0.0) | 0 (0.0) | 0 (0.0) | 0 (0.0) | |
| Gruiformes | 0 (0.0) | 0 (0.0) | 0 (0.0) | 00 (0.0) | 0 (0.0) | 11 (0.2) | 0 (0.0) | 0 (0.0) | 0 (0.0) | 1 (0.0) | 0 (0.0) | 0 (0.0) | 3 (0.0) | |
| Otidiformes | 0 (0.0) | 0 (0.0) | 0 (0.0) | 0 (0.0) | 0 (0.0) | 2 (0.0) | 0 (0.0) | 0 (0.0) | 0 (0.0) | 0 (0.0) | 0 (0.0) | 0 (0.0) | 0 (0.0) | |
| Passeriformes | 0 (0.0) | 5 (0.1) | 60 (1.0) | 77 (1.3) | 0 (0.0) | 421 (6.9) | 1 (0.0) | 3 (0.0) | 58 (1.0) | 87 (1.4) | 463 (7.6) | 1 (0.0) | 563 (9.30) | |
| Pelecaniformes | 0 (0.0) | 0 (0.0) | 0 (0.0) | 0 (0.0) | 1 (0.0) | 30 (0.5) | 0 (0.0) | 0 (0.0) | 0 (0.0) | 0 (0.0) | 0 (0.0) | 0 (0.0) | 4 (0.1) | |
| Procellariiformes | 0 (0.0) | 0 (0.0) | 0 (0.0) | 0 (0.0) | 0 (0.0) | 3 (0.0) | 0 (0.0) | 0 (0.0) | 0 (0.0) | 0 (0.0) | 0 (0.0) | 0 (0.0) | 0 (0.0) | |
| Phoenicopteriformes | 0 (0.0) | 0 (0.0) | 0 (0.0) | 0 (0.0) | 0 (0.0) | 2 (0.0) | 0 (0.0) | 0 (0.0) | 0 (0.0) | 0 (0.0) | 0 (0.0) | 0 (0.0) | 0 (0.0) | |
| Piciformes | 0 (0.0) | 3 (0.0) | 4 (0.1) | 0 (0.0) | 0 (0.0) | 28 (0.5) | 0 (0.0) | 0 (0.0) | 0 (0.0) | 0 (0.0) | 1 (0.0) | 0 (0.0) | 10 (0.2) |
| Podicipediformes | 0 (0.0) | 0 (0.0) | 0 (0.0) | 1 (0.0) | 0 (0.0) | 0 (0.0) | 0 (0.0) | 0 (0.0) | 0 (0.0) | 0 (0.0) | 0 (0.0) | 0 (0.0) | 1 (0.0) |
| Procellariiformes | 0 (0.0) | 0 (0.0) | 0 (0.0) | 0 (0.0) | 0 (0.0) | 2 (0.0) | 0 (0.0) | 0 (0.0) | 0 (0.0) | 0 (0.0) | 0 (0.0) | 0 (0.0) | 3 (0.0) |
| Strigiformes | 0 (0.0) | 31 (0.5) | 4 (0.1) | 6 (0.1) | 0 (0.0) | 242 (4.0) | 0 (0.0) | 1 (0.0) | 1 (0.0) | 0 (0.0) | 5 (0.1) | 4 (0.1) | 145 (2.4) |
| Suliformes | 0 (0.0) | 0 (0.0) | 0 (0.0) | 0 (0.0) | 0 (0.0) | 55 (0.9) | 0 (0.0) | 0 (0.0) | 4 (0.1) | 0 (0.0) | 0 (0.0) | 0 (0.0) | 60 (1.0) |
